# Supplementary material for: Serotonergic neuronal death and concomitant serotonin deficiency curb copulation ability of Drosophila platonic mutants
Source: PubMed Central journal article supplement (PMC5159827; doi:10.1038/ncomms13792), 2016-12-13
Supplement: ncomms13792-s1.pdf [file ncomms13792-s1.pdf]

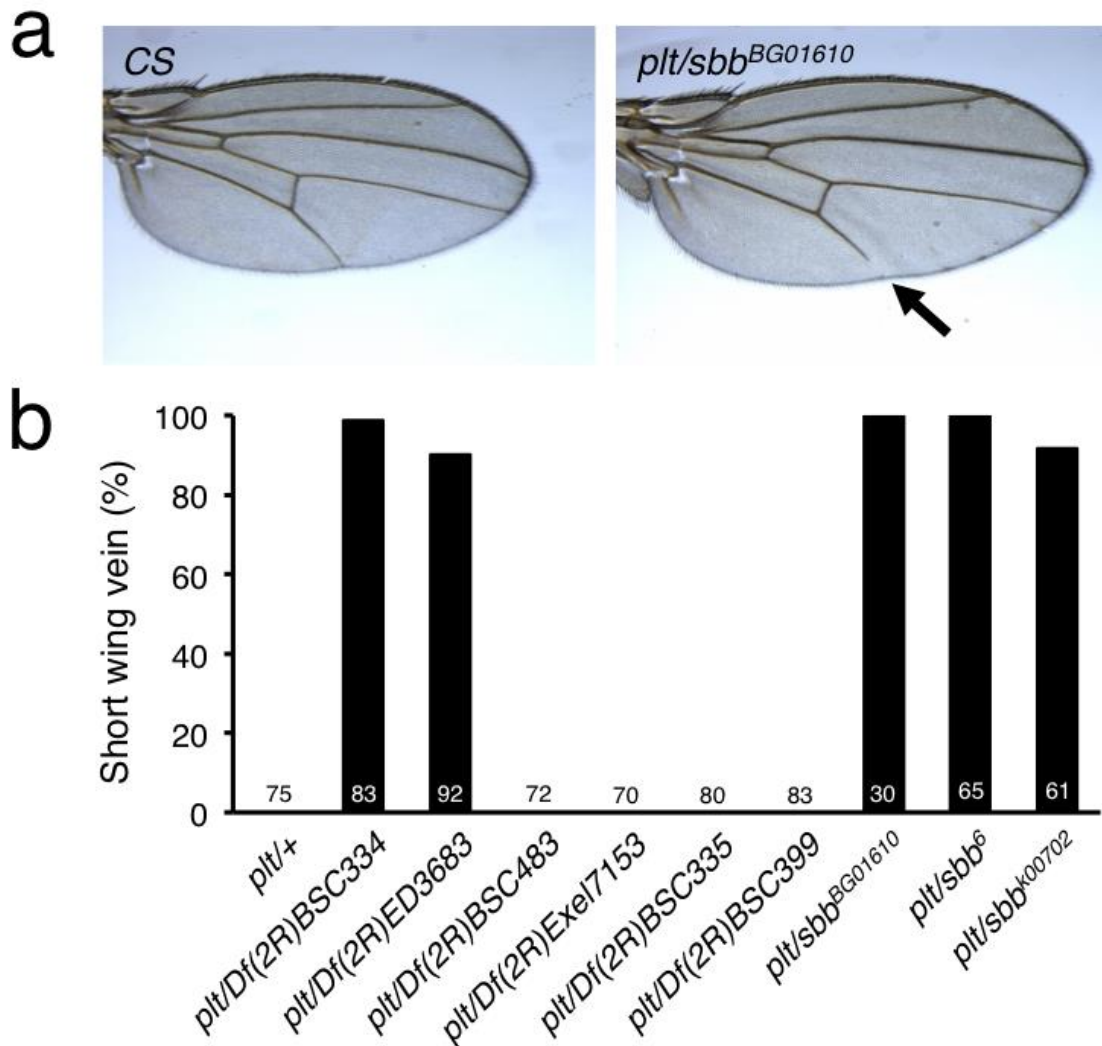

**Supplementary Figure 1. The genetic complementation test of *plt* for the short wing vein phenotype (a) A wing of the *plt* mutant and wild type. (b) The frequencies at which flies showed the short wing vein phenotype in the genetic complementation tests. The short wing vein phenotype was not observed in *plt* heterozygotes with the wild-type (+), *Df(2R)BSC483*, *Df(2R)Exel7153*, *Df(2R)BSC335* or *Df(2R)BSC399* chromosome placed *in trans* to the *plt*-harboring chromosome. The short wing vein phenotype was observed in almost all *plt* heterozygotes with *Df(2R)BSC334*, *Df(2R)ED3683*, *sbb<sup>BG01610</sup>*, *sbb<sup>6</sup>* or *sbb<sup>k00702</sup>* chromosome placed *in trans* to the *plt*-harboring chromosome.**

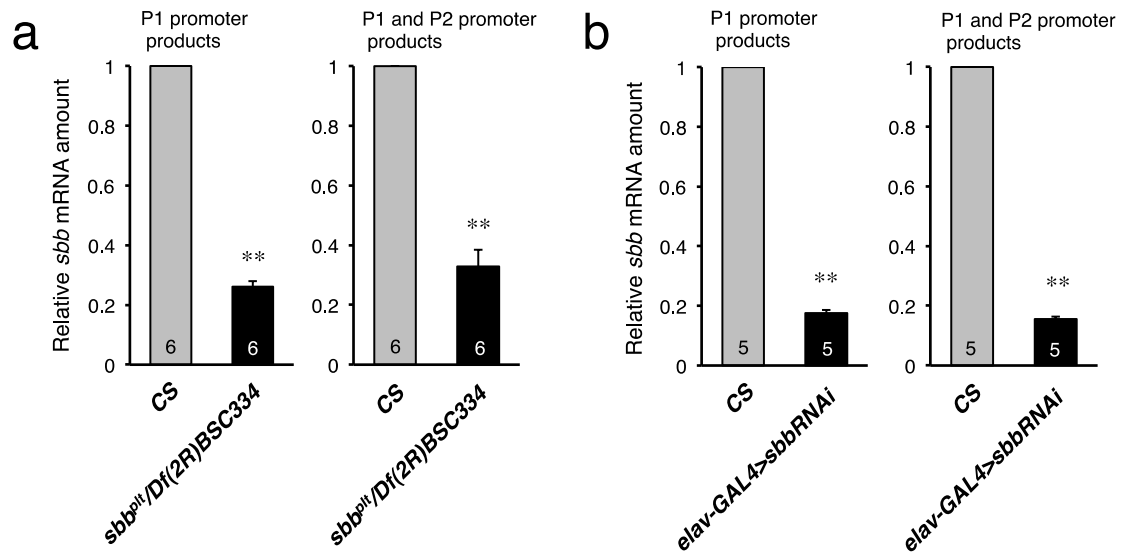

**Supplementary Figure 2. Reduced *sb* expression in *plt* mutants and the flies with *sb* was knocked down.** (a) RT-PCR for *sb* transcripts in wild-type (CS) and *plt* mutant (*sb<sup>Df</sup>/Df(2R)BSC334*) flies. The *sb* gene has two promoters, P1 and P2, and the abundance of transcripts from P1 alone and those from both P1 and P2 was quantified. (b) A similar analysis for flies in which *sb* was knocked down with *sbRNAi* in neurons (as driven by *elav-GAL4*). The genotype of flies examined was *w<sup>1118</sup> elav<sup>C155</sup>-GAL4; UAS-sb RNAi/+; UAS-Dcr2/+*. The mean  $\pm$  SEM and the number of test are shown. \*\* $P < 0.01$  by the Mann-Whitney's U-test.

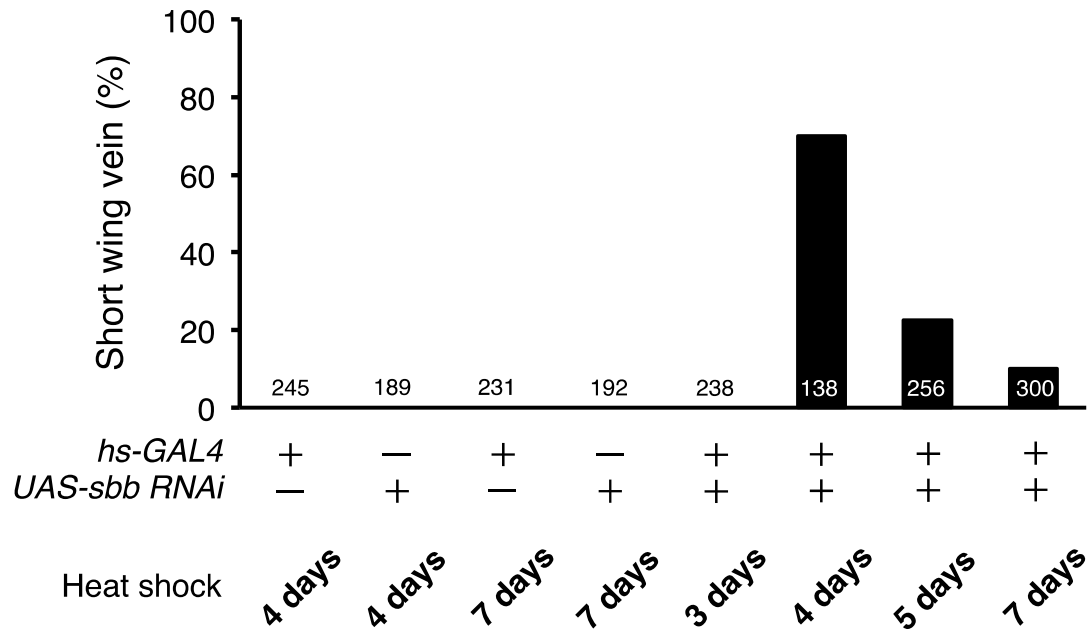

**Supplementary Figure 3. The short wing vein phenotype of *plt* was reproduced by *sbb* knockdown at the larval stage.** The wing vein phenotype of emerged flies carrying *hs-GAL4* and *UAS-sbb RNAi* (red bars) and that of the negative control groups. A heatshock of 37°C was applied for 1 hr at the indicated stages. The number of flies examined is indicated below each bar.

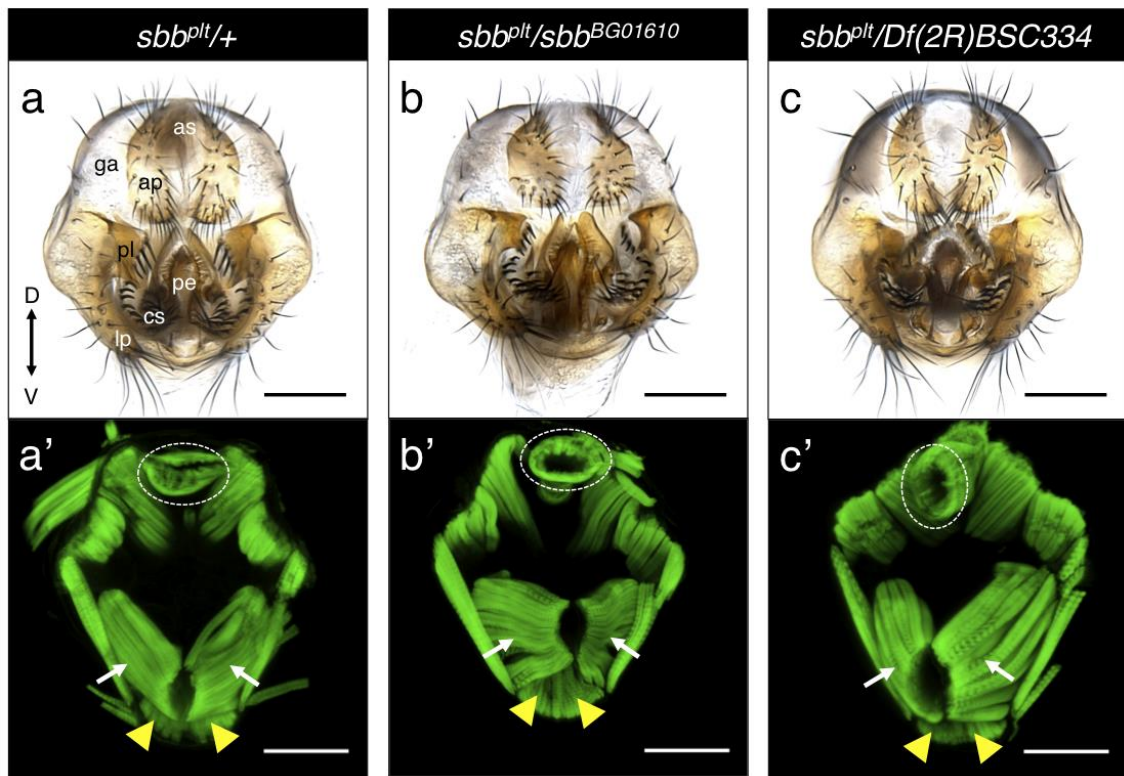

**Supplementary Figure 4. Structure of genitalia and associated muscles in *sbb* heterozygous and mutant males.** External genitalia (**a-c**) and genital muscles (**a'-c'**) of *sbb<sup>pl</sup>/+* (**a** and **a'**), *sbb<sup>pl</sup>/Df(2R)BSC334* (**b** and **b'**) and *sbb<sup>pl</sup>/sbb<sup>BG01610</sup>* (**c** and **c'**) are shown. The portions of genitalia are indicated with the following abbreviations: ap., anal plate; as, anus; cs, clasper; ga, genital arch; lp, lateral plate; pe, penis; pl, posterior lobe. White arrows and yellow arrowheads indicate the protractor and retractor muscles associated with the aedeagus, respectively. Dotted circles indicate the anus. Genital muscles were stained with FITC-labeled phalloidin. Dorsal side up. Scale bar : 100  $\mu$ m.

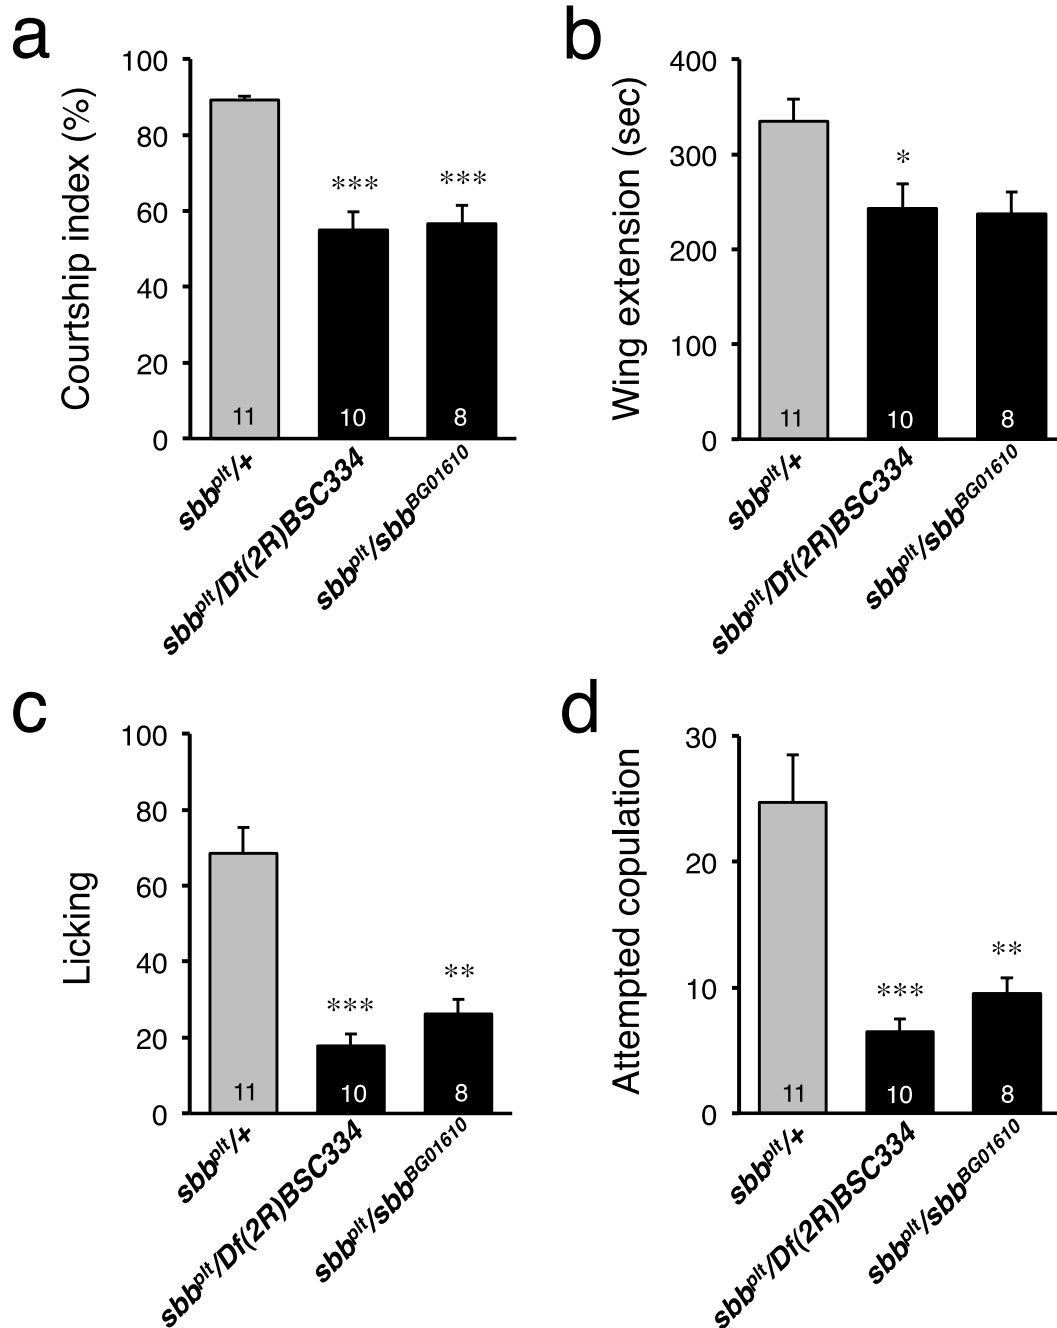

**Supplementary Figure 5. Quantitative comparisons of mating activities between *sbb* mutant and control males.** Shown are the courtship index (a), the time spent for wing extension (b), and the number of occurrences of licking (c) or attempted copulation (d) during a 10-min observation period. *plt* hemizygous males (*sbb<sup>plt</sup>/Df(2R)BSC334* and *sbb<sup>plt</sup>/sbb<sup>BG01610</sup>*) engaged in licking and attempted copulation less often than control males (*sbb<sup>plt/+</sup>*) did. The graphs represent the mean  $\pm$  SEM of the

indicated parameters and the numbers on the bars represent the numbers of flies examined. \*\*\* $P < 0.001$ , \*\* $P < 0.01$  and \* $P < 0.05$  by the Kruskal-Wallis test with Steel-Dwass' multiple pair-wise post hoc comparisons.

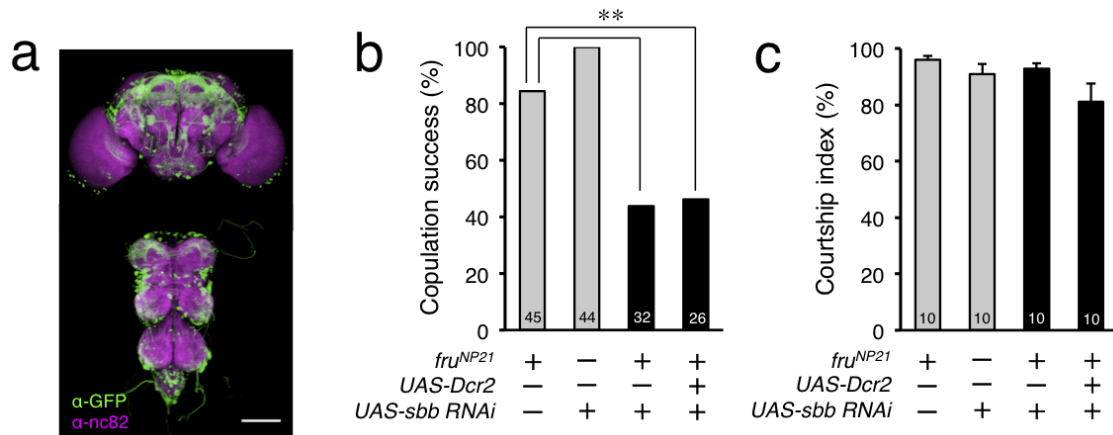

**Supplementary Figure 6. *sbb* knockdown in the *fru*-expressing cells as driven by *fru*<sup>NP21</sup> led a weak copulation defect.** (a) Image of the CNS with *fru*<sup>NP21</sup>-positive neurons. The genotype of flies is *w*; *UAS-mCD8::GFP*/+; *fru*<sup>NP21</sup>/+. Scale bar: 100  $\mu$ m. (b) The copulation success within 60 min in flies carrying *fru*<sup>NP21</sup> and *UAS-sbb RNAi* in the presence and absence of *UAS-Dcr2* and that in the control flies, *fru*<sup>NP21</sup>/+ and *UAS-sbb RNAi*/+. The copulation success was significantly decreased in the flies with *sbb* knockdown. (c) The courtship index calculated during a 10 min observation period. The number of flies examined is indicated on each bar. \*\*P<0.01 by the Chi-square test.

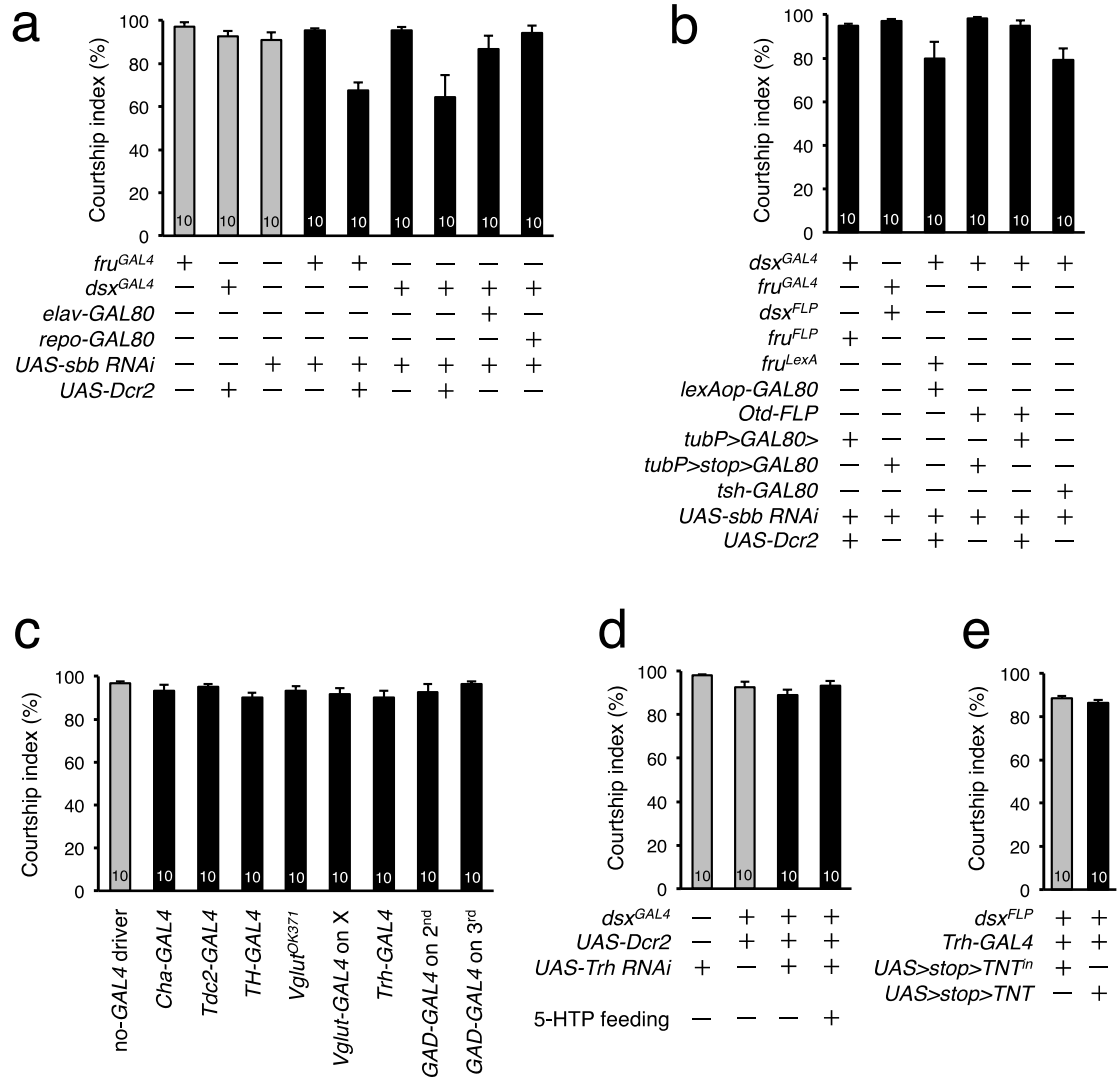

**Supplementary Figure 7. Courtship vigor was barely affected in male flies with *sbb* knockdown, *Trh* knockdown or synaptic block in *dsx*[+]/*Trh*[+] cells.** The courtship index of male flies in which *UAS-sbb*RNAi was expressed in different cell populations: all *fru*<sup>GAL4</sup>-positive cells (4<sup>th</sup> and 5<sup>th</sup> bars in **a**), *dsx*<sup>GAL4</sup>-positive cells (6<sup>th</sup> and 7<sup>th</sup> bars in **a**), *dsx*<sup>GAL4</sup>-positive cells other than neurons (8<sup>th</sup> bar in **a**), *dsx*<sup>GAL4</sup>-positive cells other than glia (9<sup>th</sup> bar in **a**), *dsx*<sup>GAL4</sup>- and *fru*<sup>GAL4</sup>- double-positive cells (1<sup>st</sup> bar in **b**), the *dsx*<sup>GAL4</sup>-negative subset of *fru*<sup>GAL4</sup>-positive cells (2<sup>nd</sup> bar in **b**), the *fru*<sup>GAL4</sup>-negative subset of *dsx*<sup>GAL4</sup>-positive cells (3<sup>rd</sup> bar in **b**), *dsx*<sup>GAL4</sup>-positive cells outside the head (4<sup>th</sup> bar in **b**), *dsx*<sup>GAL4</sup>-positive cells inside the head (5<sup>th</sup> bar in **b**), *dsx*<sup>GAL4</sup>-positive cells outside the thorax (6<sup>th</sup> bar in **b**), cells defined by different neurotransmitter-GAL4s (**c**), *dsx*<sup>GAL4</sup>-positive cells with *Trh* knockdown in flies fed on a normal or



5-HTP-supplemented food (**d**), and *dsx*- and *Trh*-double positive cells with the expression of active (*TNT*) or inactive (*TNT<sup>in</sup>*) tetanus toxin light chain (**e**). The copulation success rates estimated for these flies are shown in Figures 2c-g, 3a-d and 4d-f.

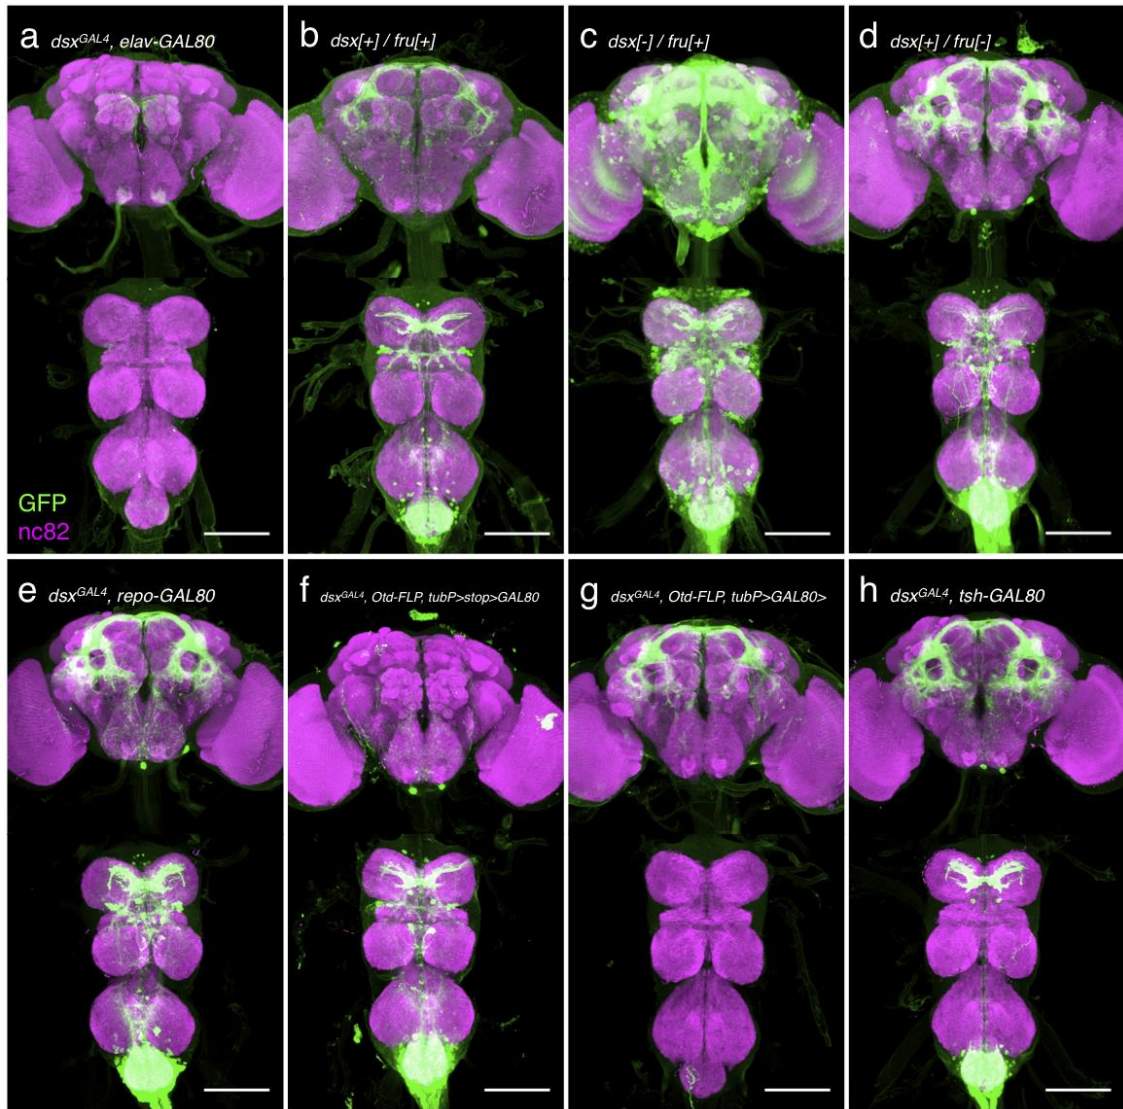

**Supplementary Figure 8. Expression of GAL4 in flies tested for the effects on copulation success of *sbb* knockdown.** GAL4 expression was detected in:  $dsx^{GAL4}$ -positive cells other than neurons (a),  $dsx^{GAL4}$ - and  $fru^{GAL4}$ - double positive cells (b), the  $dsx^{GAL4}$ -negative subset of  $fru^{GAL4}$ -positive cells (c), the  $fru^{GAL4}$ -negative subset of  $dsx^{GAL4}$ -positive cells (d),  $dsx^{GAL4}$ -positive cells other than glia (e),  $dsx^{GAL4}$ -positive cells outside the head (f),  $dsx^{GAL4}$ -positive cells inside the head (g), and  $dsx^{GAL4}$ -positive cells outside the thorax (h). Scale bar: 100  $\mu$ m. GAL4 expression was detected by a GFP reporter (green) in the brain which was counterstained with nc82 (magenta). The copulation success rates estimated for these flies are shown in Figures 2c-g and 3a-c.

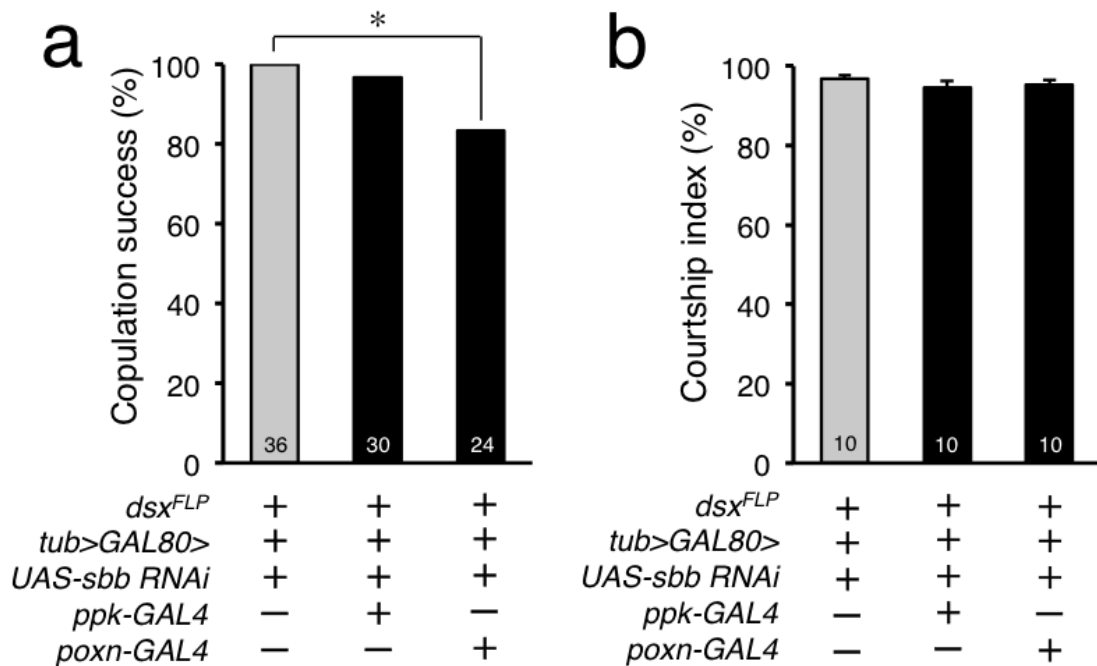

**Supplementary Figure 9. *sbb* knockdown in *dsx*<sup>+</sup>/*ppk*<sup>+</sup> or *dsx*<sup>+</sup>/*poxn*<sup>+</sup> neurons. (a)** The mating success of flies with the genotype of *dsx*<sup>FLP</sup>, *UAS-sbb RNAi*, *tubP>GAL80>* with *ppk-GAL4* or *poxn-GAL4* and of the control flies, *dsx*<sup>FLP</sup>, *UAS-sbb RNAi*, *tubP>GAL80>* without *GAL4* drivers. **(b)** The courtship index calculated during a 10 min observation period for the flies with indicated genotypes. The number of flies examined is indicated on each bar. \*P<0.05 by the Chi-square test.

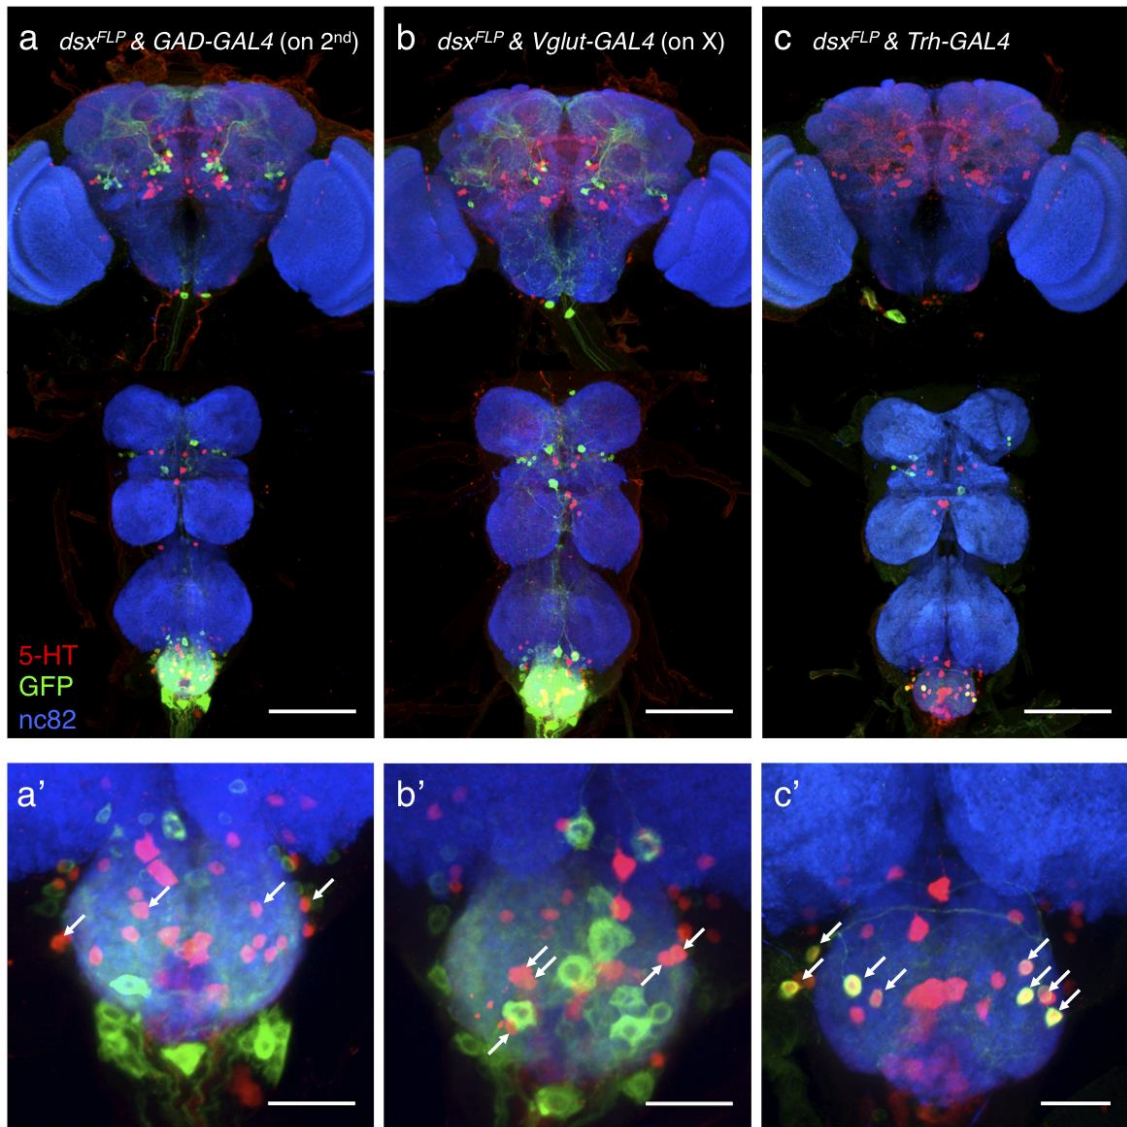

**Supplementary Figure 10. 5-HT and GAL4 expression in flies used for the identification of CNS cells that affect copulation success.** Anti-5-HT immunoreactivity of *dsx*-expressing cells that are also positive for *GAD-GAL4* (**a** and **a'**), *Vglut-GAL4* (**b** and **b'**) or *Trh-GAL4* (**c** and **c'**). The abdominal ganglia are shown with a higher magnification in (**a'**) –(**c'**). GAL4 expression was monitored with a GFP reporter (green) in the CNS that was also stained with the anti-5-HT antibody (red) and nc82 (magenta). Some of the cells doubly positive for 5-HT and GFP in the abdominal ganglia are indicated with arrows in (**a'**) – (**c'**). The genotypes of flies are *w*; *GAD-GAL4/UAS>stop>mCD8::GFP; dsx<sup>FLP</sup>/+* (**a**), *Vglut-GAL4* on X; *UAS>stop>mCD8::GFP/+ ; dsx<sup>FLP</sup>/+* (**b**) and *w*; *Trh-GAL4/UAS>stop>mCD8::GFP; dsx<sup>FLP</sup>/+* (**c**), respectively. Scale bar : 100  $\mu$ m (**a**, **b** and **c**) and 20  $\mu$ m (**a'**, **b'** and **c'**).

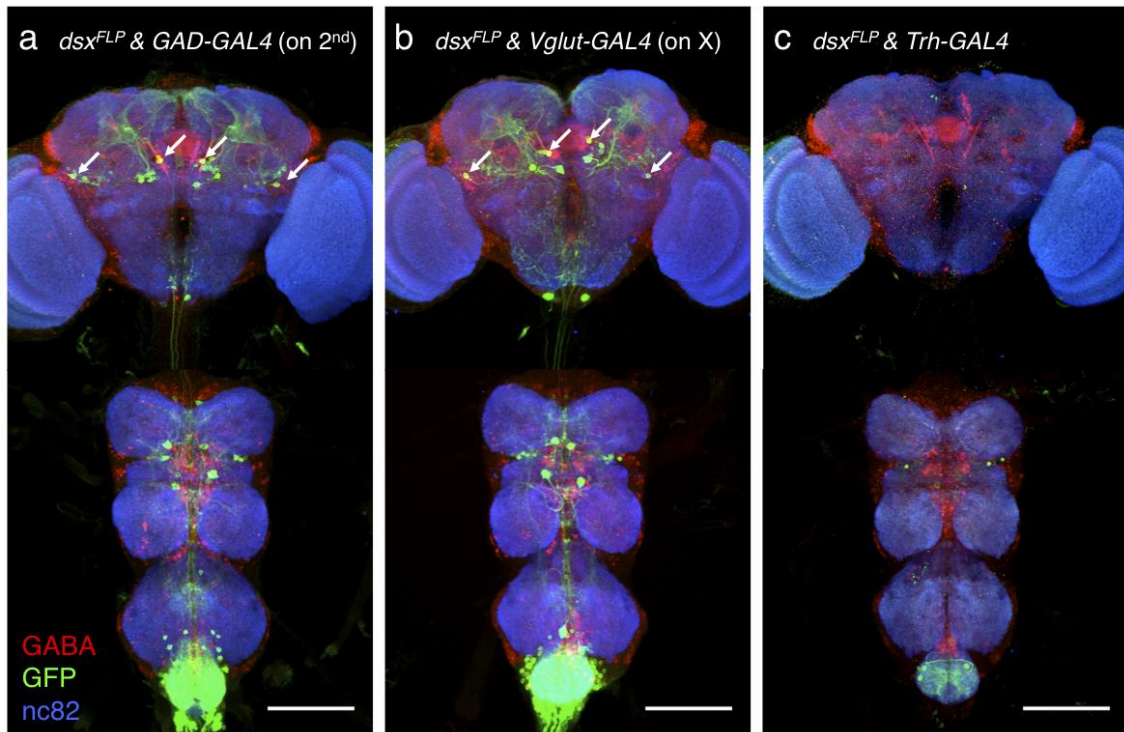

**Supplementary Figure 11. GABA and GAL4 expression in flies used for the identification of CNS cells that affect copulation success.** Anti-GABA immunoreactivity of *dsx*-expressing cells that are also positive for *GAD-GAL4* (a), *Vglut-GAL4* (b) or *Trh-GAL4* (c). GAL4 expression was monitored with a GFP reporter (green) in the CNS that was also stained with the anti-GABA antibody (red) and nc82 (magenta). Some of the cells doubly positive for GABA and GFP in the brain are indicated with arrows in (a) and (b). Scale bar: 100 μm.



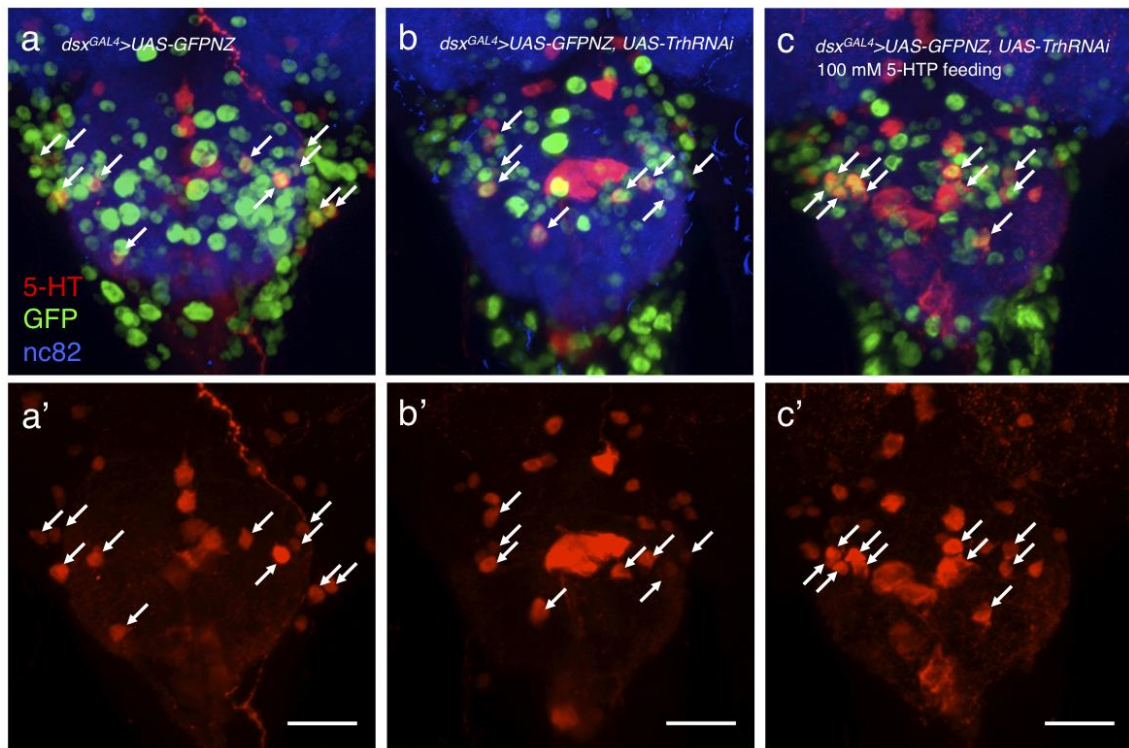

**Supplementary Figure 12. Effects of *Trh* knockdown and subsequent feeding of 5-HTP on neuronal 5-HT expression.** Cells in the abdominal ganglia immunoreactive to the anti-5-HT antibody (red) in a control fly (**a** and **a'**) and flies in which *Trh* was knocked down fed on a diet without (**b** and **b'**) or with (**c** and **c'**) 100 mM 5-HTP after eclosion. The genotypes of flies were *w*; *UAS-GFPNZ*/+; *dsx*<sup>*GAL4*</sup>/+ (**a**) and *w*; *UAS-GFPNZ*/*UAS-Dcr2*; *dsx*<sup>*GAL4*</sup>/*UAS-TrhRNAi* (**b** and **c**). Scale bar: 20  $\mu$ m. *dsx*-expressing cells were labeled with nuclear localizing GFP (green). The cells double-positive for *dsx* and 5-HT (*dsx*[+]/5-HT[+]) are indicated with arrows. The mean  $\pm$  SEM of the number of *dsx*[+]/5-HT[+] cells was  $10 \pm 0.3$  (n=6) in control flies,  $7.7 \pm 0.3$  (n=7) in flies with *Trh* knockdown fed on a normal diet, and  $11.5 \pm 0.7$  (n=4) in flies with *Trh* knockdown fed on a 5-HTP supplemented diet. The value for the flies with *Trh* knockdown fed on a normal diet was significantly smaller than that for control and for 5-HTP-fed flies with *Trh* knockdown, whereas the values for the latter two groups were statistically indistinguishable from each other ( $P < 0.05$  by the Kruskal-Wallis test with Steel-Dwass' multiple pair-wise post hoc comparisons).

### Supplementary Note

Detailed genotypes of all strains used in the paper as follows:

#### Figure 1a, Supplementary Figure 1b (from left to right)

*plt/+*

*plt/Df(2R)BSC334*

*plt/Df(2R)ED3683*

*plt/Df(2R)BSC483*

*plt/Df(2R)Exel7153*

*plt/Df(2R)BSC335*

*plt/Df(2R)BSC399*

*plt/sbb<sup>BG01610</sup>*

*plt/sbb<sup>6</sup>*

*plt/sbb<sup>k00702</sup>*

#### Figure 1d, Supplementary Figure 3

*w; UAS-sbbRNAi/+; hs-GAL4/+*

#### Figure 2a (left)

*w; UAS-mCD8::GFP/+; fru<sup>GAL4</sup>/+*

#### Figure 2a (right)

*+;; fru<sup>GAL4</sup>/+*

*w; UAS-sbbRNAi/+*

*w; UAS-sbbRNAi/+; fru<sup>GAL4</sup>/+*

*w; UAS-sbbRNAi/+; fru<sup>GAL4</sup>/UAS-Dcr2*

#### Figure 2b (left)

*w; UAS-mCD8::GFP/+; dsx<sup>GAL4</sup>/+*

#### Figure 2a (right)

*+;; dsx<sup>GAL4</sup>/+*

*w; UAS-sbbRNAi/+*

*w; UAS-sbbRNAi/+; dsx<sup>GAL4</sup>/+*

*w; UAS-sbbRNAi/UAS-Dcr2; dsx<sup>GAL4</sup>/+*

**Figure 2c**

w; *UAS-sbbRNAi/+; elav-GAL80/+*  
w; *UAS-sbbRNAi/+; dsx<sup>GAL4</sup>/+*  
w; *UAS-sbbRNAi/+; dsx<sup>GAL4</sup>/elav-GAL80*

**Figure 2d**

w; *UAS-sbbRNAi/+*  
w; *UAS-sbbRNAi/+; dsx<sup>GAL4</sup>/+*  
w; *UAS-sbbRNAi/+; dsx<sup>GAL4</sup>/repo-GAL80*

**Figure 2e**

w; *UAS-sbbRNAi/+; fru<sup>FLP</sup>/+*  
w; *UAS-sbbRNAi/UAS-Dcr2; dsx<sup>GAL4</sup>/+*  
*tubP>GAL80>; UAS-sbbRNAi/UAS-Dcr2; dsx<sup>GAL4</sup>/fru<sup>FLP</sup>*

**Figure 2f**

w; *UAS-sbbRNAi/+; fru<sup>GAL4</sup>/+*  
w; *UAS-sbbRNAi/tubP>GAL80>; fru<sup>GAL4</sup>/+*  
w; *UAS-sbbRNAi/tubP>GAL80>; fru<sup>GAL4</sup>/dsx<sup>FLP</sup>*

**Figure 2g**

w; *UAS-sbbRNAi/+; fru<sup>LexA</sup>, lexAop-GAL80/+*  
w; *UAS-sbbRNAi/UAS-Dcr2; dsx<sup>GAL4</sup>/+*  
w; *UAS-sbbRNAi/UAS-Dcr2; dsx<sup>GAL4</sup>/fru<sup>LexA</sup>, lexAop-GAL80*

**Figure 3a**

w; *Otd-FLP/+; dsx<sup>GAL4</sup>/+*  
w; *Otd-FLP/UAS-sbbRNAi; dsx<sup>GAL4</sup>/+*  
w; *Otd-FLP/UAS-sbbRNAi; dsx<sup>GAL4</sup>/UAS>stop>GAL80*

**Figure 3b**

w; *Otd-FLP/+; dsx<sup>GAL4</sup>/+*  
*tubP>GAL80>; UAS-sbbRNAi/+; UAS-Dcr2/+*



*w; UAS-sbbRNAi/Otd-FLP; UAS-Dcr2/dsx<sup>GAL4</sup>*  
*tubP>GAL80>; UAS-sbbRNAi/Otd-FLP; UAS-Dcr2/dsx<sup>GAL4</sup>*

### Figure 3c

*w; UAS-sbbRNAi/+*  
*w; UAS-sbbRNAi/+; dsx<sup>GAL4</sup>/+*  
*w; UAS-sbbRNAi/tsh-GAL80; dsx<sup>GAL4</sup>/+*

### Figure 3d

*w; UAS-sbbRNAi, tubP>GAL80>/+; dsx<sup>FLP</sup>/+*  
*w; UAS-sbbRNAi, tubP>GAL80>/Cha-GAL4, UAS-GFP; dsx<sup>FLP</sup>/+*  
*w; UAS-sbbRNAi, tubP>GAL80>/Tdc2-GAL4; dsx<sup>FLP</sup>/+*  
*w; UAS-sbbRNAi, tubP>GAL80>/+; dsx<sup>FLP</sup>/TH-GAL4*  
*w; UAS-sbbRNAi, tubP>GAL80>/Vglut-GAL4<sup>OK371</sup>; dsx<sup>FLP</sup>/+*  
*Vglut-GAL4 on X; UAS-sbbRNAi, tubP>GAL80>/+; dsx<sup>FLP</sup>/+*  
*w; UAS-sbbRNAi, tubP>GAL80>/Trh-GAL4; dsx<sup>FLP</sup>/+*  
*w; UAS-sbbRNAi, tubP>GAL80>/GAD-GAL4 on 2<sup>nd</sup>; dsx<sup>FLP</sup>/+*  
*w; UAS-sbbRNAi, tubP>GAL80>/+; dsx<sup>FLP</sup>/GAD-GAL4 on 3<sup>rd</sup>*

### Figure 3e

*w; GAD-GAL4 on 2<sup>nd</sup>/UAS>stop>mCD8::FLP/+*

### Figure 3f

*w; UAS>stop>mCD8::FLP/GAD-GAL4 on 3<sup>rd</sup>*

### Figure 3g

*w; Trh-GAL4/UAS>stop>mCD8::FLP/+*

### Figure 3h

*Vglut-GAL4 on X; UAS>stop>mCD8::FLP/+*

### Figure 4a

*w; Trh-GAL4/UAS>stop>mCD8::FLP/+*

**Figure 4b**

*w; Trh-GAL4/UAS-sbbRNAi, tubP>GAL80>; dsx<sup>FLP</sup>/UAS>stop>mCD8::GFP*

**Figure 4c**

*w; Trh-GAL4/UAS>stop>mCD8::GFP; dsx<sup>FLP</sup>/+*

**Figure 4d**

*+;; UAS-TrhRNAi/+*

*w; UAS-Dcr2/+; dsx<sup>GAL4</sup>/+*

*w; UAS-Dcr2/+; dsx<sup>GAL4</sup>/UAS-TrhRNAi*

**Figure 4e**

*w; UAS>stop>TNT<sup>in</sup>/Trh-GAL4; dsx<sup>FLP</sup>/+*

*w; UAS>stop>TNT/Trh-GAL4; dsx<sup>FLP</sup>/+*

**Figure 4f**

*w; UAS-Dcr2/+; dsx<sup>GAL4</sup>/UAS-TrhRNAi*

**Supplementary Figure 2a**

*sbb<sup>plt</sup>/DF(2R)BSC334*

**Supplementary Figure 2b**

*elav<sup>c155</sup>-GAL4 w ; UAS-sbbRNAi/+; UAS-Dcr2/+*

**Supplementary Figure 4 and 5**

*sbb<sup>plt</sup>/+*

*sbb<sup>plt</sup>/Df(2R)BSC334*

*sbb<sup>plt</sup>/sbb<sup>BG01610</sup>*

**Supplementary Figure 6a**

*w; UAS-mCD8::GFP/+; fru<sup>NP21</sup>/+*

**Supplementary Figure 6b and 6c**

+;; *fru*<sup>NP21</sup>/+  
w; *UAS-sbbRNAi*/+  
w; *UAS-sbbRNAi*/+; *fru*<sup>NP21</sup>/+  
w; *UAS-sbbRNAi*/+; *fru*<sup>NP21</sup>/*UAS-Dcr2*

### Supplementary Figure 7

same genotypes used in Figures 2c-g, 3a-d and 4d-f.

### Supplementary Figure 8

(a) w; *UAS-mCD8::GFP*/+; *dsx*<sup>GAL4</sup>/*elav-GAL80*  
(b) w; *UAS>stop>mCD8::GFP*/+; *dsx*<sup>GAL4</sup>/*fru*<sup>FLP</sup>  
(c) w; *UAS-mCD8::GFP/tubP>stop>GAL80*; *fru*<sup>GAL4</sup>/*dsx*<sup>FLP</sup>  
(d) w; *UAS-mCD8::GFP*/+; *dsx*<sup>GAL4</sup>/*fru*<sup>LexA</sup>, *lexAop-GAL80*  
(e) w; *UAS-mCD8::GFP*/+; *dsx*<sup>GAL4</sup>/*repo-GAL80*  
(f) w; *UAS-mCD8::GFP/Otd-FLP*; *dsx*<sup>GAL4</sup>/*tubP>stop>GAL80*  
(g) w; *UAS-mCD8::GFP/Otd-FLP*; *dsx*<sup>GAL4</sup>/*tubP>GAL80>*  
(h) w; *UAS-mCD8::GFP/tsh-GAL80*; *dsx*<sup>GAL4</sup>/+

### Supplementary Figure 9

w; *UAS-sbbRNAi*, *tub>GAL80>/+*; *dsx*<sup>FLP</sup>/+  
*ppk-GAL4*; *UAS-sbbRNAi*, *tub>GAL80>/+*; *dsx*<sup>FLP</sup>/+  
w; *UAS-sbbRNAi*, *tub>GAL80>/+*; *dsx*<sup>FLP</sup>/*poxn-GAL4-14-1-7*

### Supplementary Figure 10 and 11

(a) w; *UAS>stop>mCD8::GFP/GAD-GAL4* on 2<sup>nd</sup>; *dsx*<sup>FLP</sup>/+  
(b) *Vglut-GAL4* on X; *UAS>stop>mCD8::GFP*/+; *dsx*<sup>FLP</sup>/+  
(c) w; *UAS>stop>mCD8::GFP/Trh-GAL4*; *dsx*<sup>FLP</sup>/+

### Supplementary Figure 12

(a) w; *UAS-GFPNZ*/+; *dsx*<sup>GAL4</sup>/+  
(b and c) w; *UAS-GFPNZ/UAS-Dcr2*; *dsx*<sup>GAL4</sup>/*UAS-TrhRNAi*
